# Supplementary material for: Contents Changes of Triterpenic Acids, Nucleosides, Nucleobases, and Saccharides in Jujube (Ziziphus jujuba) Fruit During the Drying and Steaming Process
Source: PubMed Central journal article supplement (PMC6332246; doi:10.3390/molecules201219852), 2015-12-12
Supplement: molecules-20-19852-s001.pdf [file molecules-20-19852-s001.pdf]

# Supplementary Materials: Contents Changes of Triterpenic Acids, Nucleosides, Nucleobases, and Saccharides in Jujube (*Ziziphus jujuba*) Fruit During the Drying and Steaming Process

Sheng Guo, Jin-ao Duan, Ying Zhang, Dawei Qian, Yuping Tang, Zhenhua Zhu and Hanqing Wang

**Table S1.** Calibration curves, LOD and LOQ data of the investigated triterpenic acids by HPLC-ELSD.

| Analyte         | Calibration Curves <sup>a</sup> | r <sup>2</sup> | Linear Range (µg/mL) | LOD <sup>b</sup> (µg/mL) | LOQ (µg/mL) |
|-----------------|---------------------------------|----------------|----------------------|--------------------------|-------------|
| Ceanothic acid  | y = 1.6327x + 2.2567            | 0.9987         | 3.890–311.2          | 1.94                     | 3.89        |
| Alphitolic acid | y = 1.6120x + 2.2142            | 0.9986         | 12.24–979.2          | 2.45                     | 4.90        |
| Maslinic acid   | y = 1.6025x + 2.1014            | 0.9990         | 11.98–958.4          | 3.20                     | 5.99        |
| Corosolic acid  | y = 1.6535x + 2.2431            | 0.9995         | 7.680–614.4          | 3.84                     | 7.68        |
| Betulinic acid  | y = 1.6538x + 1.8978            | 0.9989         | 12.15–972.0          | 3.43                     | 6.85        |
| Oleanolic acid  | y = 1.6196x + 2.0233            | 0.9987         | 11.58–926.4          | 3.86                     | 7.72        |
| Ursolic acid    | y = 1.5901x + 2.4257            | 0.9992         | 10.02–801.6          | 3.34                     | 6.68        |
| Betulonic acid  | y = 1.6434x + 1.8524            | 0.9995         | 13.02–1042           | 4.34                     | 8.68        |
| Oleanonic acid  | y = 1.6425x + 1.9150            | 0.9993         | 14.98–1198           | 4.99                     | 9.98        |
| Ursonic acid    | y = 1.6489x + 1.9481            | 0.9990         | 14.05–1124           | 4.68                     | 9.36        |

<sup>a</sup> Y is the logarithmic value of peak area, and X is the logarithmic value of the reference compound's concentration (µg/mL); <sup>b</sup> LOD and LOQ were determined at the S/N of about 3 and 10, respectively.

**Table S2.** Precision, repeatability, stability, and recovery of the investigated triterpenic acids by HPLC-ELSD.

| Analyte         | Precision (RSD, %) |                   | Repeatability (RSD, %, n = 6) | Stability (RSD, %, n = 6) | Recovery (%, n = 3) |     |
|-----------------|--------------------|-------------------|-------------------------------|---------------------------|---------------------|-----|
|                 | Intra-Day (n = 6)  | Inter-Day (n = 6) |                               |                           | Mean                | RSD |
| Ceanothic acid  | 2.0                | 2.6               | 3.2                           | 2.8                       | 97.5                | 2.0 |
| Alphitolic acid | 1.9                | 2.1               | 2.5                           | 2.6                       | 96.8                | 2.9 |
| Maslinic acid   | 2.2                | 2.7               | 2.7                           | 2.2                       | 98.0                | 3.1 |
| Corosolic acid  | 2.5                | 2.9               | 3.3                           | 3.0                       | 102.4               | 3.3 |
| Betulinic acid  | 1.7                | 2.8               | 2.8                           | 2.7                       | 96.9                | 3.1 |
| Oleanolic acid  | 2.1                | 3.1               | 2.9                           | 2.2                       | 96.4                | 2.7 |
| Ursolic acid    | 1.9                | 1.9               | 2.4                           | 2.9                       | 100.3               | 2.9 |
| Betulonic acid  | 2.6                | 2.7               | 2.7                           | 3.0                       | 96.2                | 2.4 |
| Oleanonic acid  | 2.3                | 2.4               | 3.0                           | 3.2                       | 95.1                | 3.2 |
| Ursonic acid    | 2.8                | 3.0               | -                             | -                         | -                   | -   |

**Table S3.** Calibration Curves, LOD and LOQ Data of the Investigated nucleobases and nucleosides by UPLC-DAD.

| Analyte      | Calibration Curves <sup>a</sup> | r <sup>2</sup> | Linear Range (µg/mL) | LOD <sup>b</sup> (µg/mL) | LOQ (µg/mL) |
|--------------|---------------------------------|----------------|----------------------|--------------------------|-------------|
| Uracil       | y = 432.82x + 10.15             | 0.9997         | 0.12-12.05           | 0.024                    | 0.070       |
| Hypoxanthine | y = 1056.32x - 10.54            | 0.9999         | 0.11-10.95           | 0.011                    | 0.040       |
| Guanine      | y = 158.67x + 19.42             | 0.9998         | 0.15-15.12           | 0.030                    | 0.098       |
| Cytidine     | y = 432.16x + 7.57              | 0.9995         | 0.19-19.13           | 0.038                    | 0.120       |
| Uridine      | y = 457.32x - 54.07             | 0.9996         | 0.49-49.32           | 0.025                    | 0.060       |
| Adenine      | y = 1143.63x - 24.52            | 0.9997         | 0.15-14.95           | 0.015                    | 0.050       |
| cGMP         | y = 458.65x + 7.94              | 0.9999         | 0.10-10.45           | 0.021                    | 0.063       |
| Guanosine    | y = 606.85x - 7.85              | 0.9998         | 0.20-20.10           | 0.020                    | 0.070       |
| cAMP         | y = 637.68x + 22.33             | 0.9999         | 0.50-49.58           | 0.015                    | 0.045       |

<sup>a</sup> Y is the value of peak area, and X is the value of the reference compound's concentration (µg/mL);

<sup>b</sup> LOD and LOQ were determined at the S/N of about 3 and 10, respectively.

**Table S4.** Precision, repeatability, stability and recovery of nucleobases and nucleosides by UPLC-DAD.

| Analyte      | Precision (RSD, %) |                   | Repeatability (RSD, %, n = 6) | Stability (RSD, %, n = 6) | Recovery (% , n = 3) |      |
|--------------|--------------------|-------------------|-------------------------------|---------------------------|----------------------|------|
|              | Intra-Day (n = 6)  | Inter-Day (n = 6) |                               |                           | Mean                 | RSD  |
| Uracil       | 0.84               | 1.68              | 1.58                          | 1.32                      | 98.1                 | 1.98 |
| Hypoxanthine | 0.43               | 0.85              | 2.01                          | 1.54                      | 102.3                | 2.05 |
| Guanine      | 0.52               | 1.56              | 1.67                          | 1.89                      | 96.6                 | 2.22 |
| Cytidine     | 0.31               | 1.32              | 1.59                          | 0.98                      | 98.3                 | 1.68 |
| Uridine      | 0.33               | 2.05              | 1.32                          | 0.65                      | 99.6                 | 1.76 |
| Adenine      | 0.40               | 1.64              | 2.09                          | 0.79                      | 97.5                 | 1.88 |
| cGMP         | 0.39               | 2.02              | 0.98                          | 2.15                      | 101.3                | 2.12 |
| Guanosine    | 0.56               | 1.55              | 0.65                          | 1.21                      | 97.2                 | 2.06 |
| cAMP         | 0.22               | 0.94              | 1.87                          | 2.24                      | 99.4                 | 2.05 |

**Table S5.** Linear regression data, LOD and LOQ of the investigated sugars by HPLC-ELSD.

| Analyte  | Calibration Curves <sup>a</sup> | r <sup>2</sup> | Linear Range (µg/mL) | LOD <sup>b</sup> (µg/mL) | LOQ (µg/mL) |
|----------|---------------------------------|----------------|----------------------|--------------------------|-------------|
| Sucrose  | y = 1.5811x + 1.6259            | 0.9982         | 108.2-2164           | 54.1                     | 108.2       |
| Glucose  | y = 1.5845x + 1.8763            | 0.9991         | 248.3-4966           | 30.1                     | 60.2        |
| Fructose | y = 1.5789x + 2.1956            | 0.9979         | 241.2-4824           | 40.2                     | 80.4        |

<sup>a</sup> y is the logarithmic value of peak area and x is the logarithmic value of the reference compound's concentration (µg/mL); <sup>b</sup> LOD and LOQ were determined at the S/N of about 3 and 10, respectively.

**Table S6.** Precision, repeatability, stability and recovery of the investigated sugars by HPLC-ELSD.

| Analyte  | Precision (RSD, %) |                   | Repeatability (RSD, %, n = 6) | Stability (RSD, %, n = 6) | Recovery (% , n = 3) |      |
|----------|--------------------|-------------------|-------------------------------|---------------------------|----------------------|------|
|          | Intra-Day (n = 6)  | Inter-Day (n = 3) |                               |                           | Mean                 | RSD  |
| Sucrose  | 2.04               | 4.36              | 2.30                          | 3.69                      | 97.38                | 2.87 |
| Glucose  | 2.31               | 3.11              | 1.95                          | 1.99                      | 102.10               | 3.26 |
| Fructose | 2.54               | 3.20              | 2.07                          | 2.70                      | 96.35                | 3.99 |

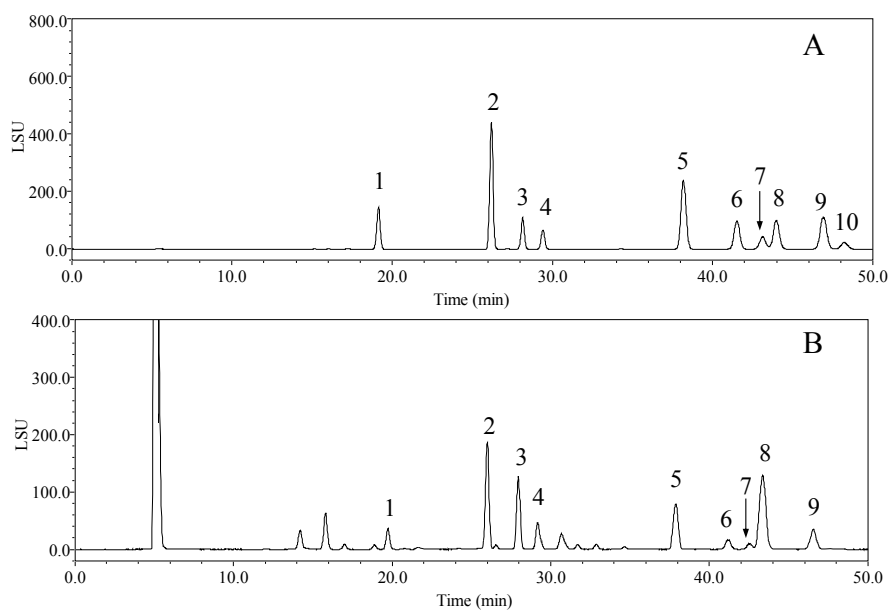

**Figure S1.** Typical HPLC-ELSD chromatograms of triterpenic acids in mixed standards (A) and sample of jujube fruits (B). Peak identities: ceanothic acid (1), alphitolic acid (2), maslinic acid (3), corosolic acid (4), betulinic acid (5), oleanolic acid (6), ursolic acid (7), betulonic acid (8), oleanonic acid (9), ursonic acid (10).

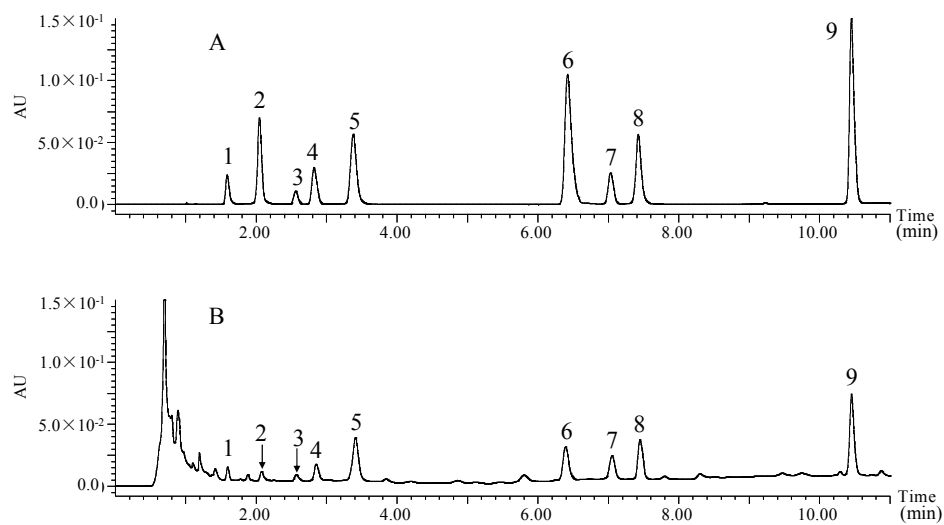

**Figure S2.** Typical UHPLC-DAD chromatograms of nucleosides and nucleobases in mixed standards (A) and sample of jujube fruits (B). Peak identities: uracil (1), hypoxanthine (2), guanine (3), cytidine (4), uridine (5), adenine (6), cGMP (7), guanosine (8), cAMP (9).

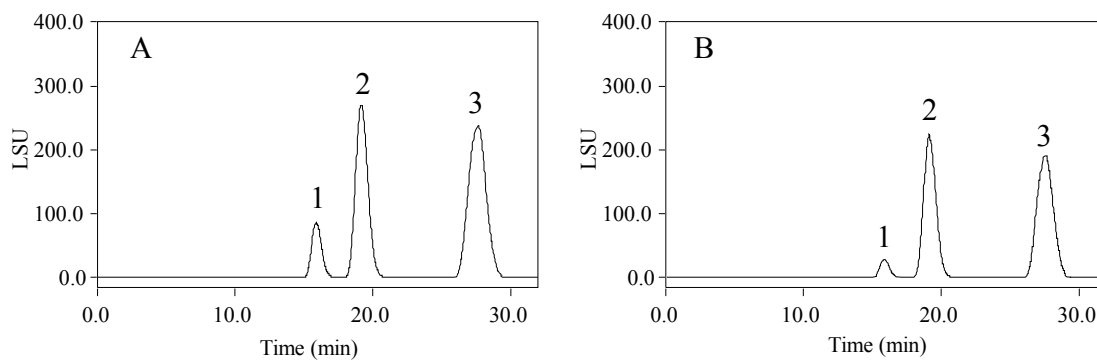

**Figure S3.** Typical HPLC-ELSD chromatograms of sugars in mixed standards (A) and sample solutions (B). Peak identities: sucrose (1), glucose (2), fructose (3).
